# Supplementary material
Source: PubMed Central journal article supplement (PMC2949003)
Supplement: pp.110.162057_1.pdf [file pp.110.162057_1.pdf]

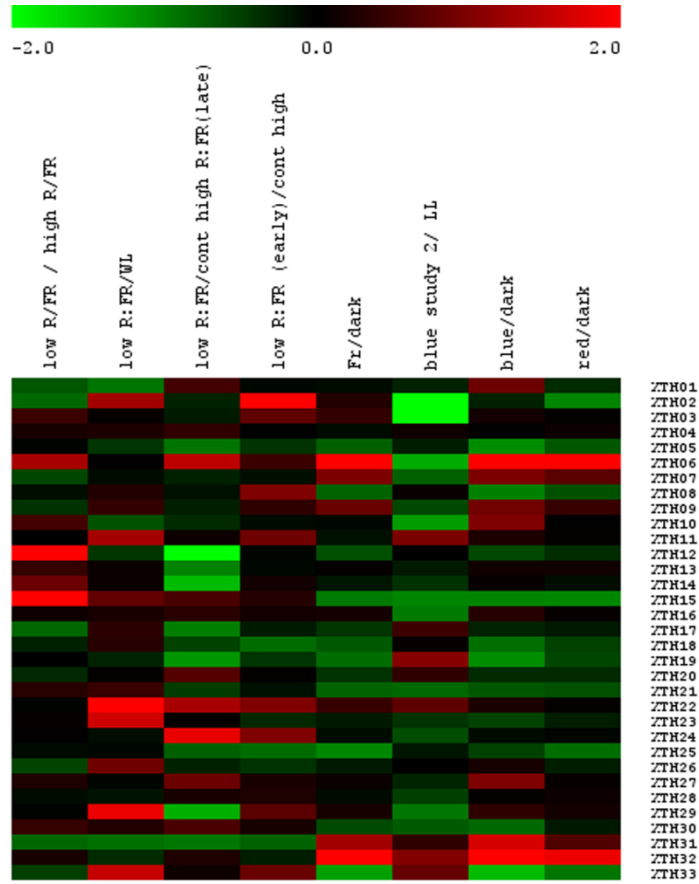

Figure S1: Genevestigator Arabidopsis XTH gene expression in response to light quality manipulations. The heat map was constructed using data compiled from relevant microarray experiments as reported by Genevestigator. Expression values are depicted as log<sub>2</sub> ratios indicating fold changes and colour coded to indicate up (red) and down (green) regulation relative to controls.

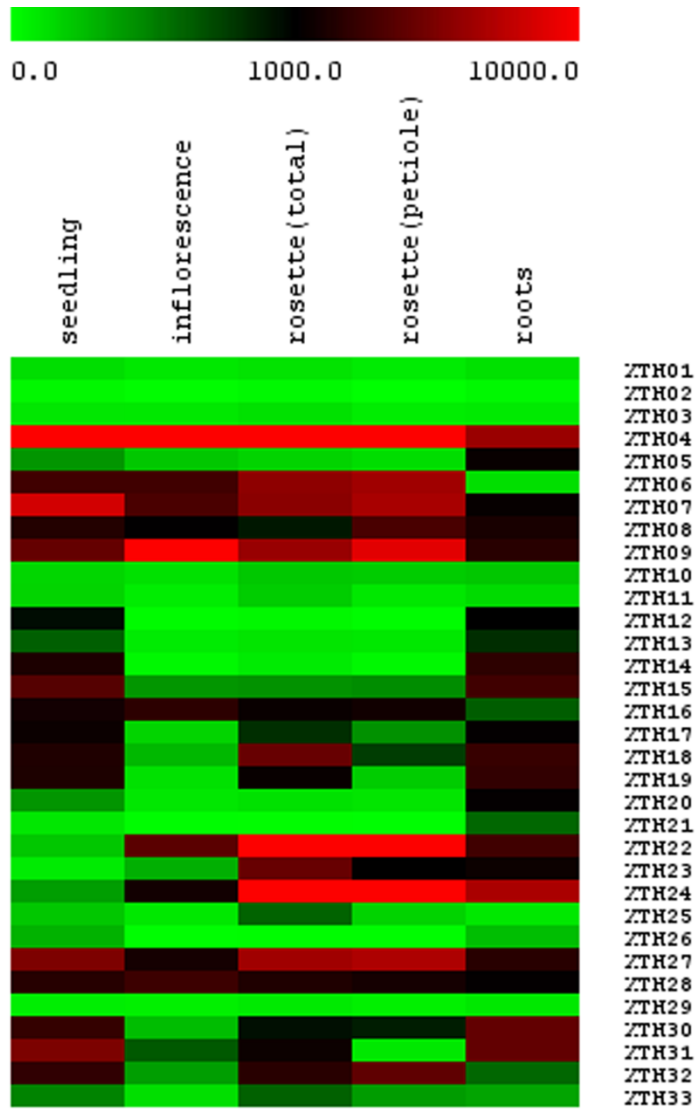

Figure S2: Genevestigator XTH organ-specific expression. Expression data was compiled from relevant microarray experiments as reported by Genevestigator. Data are depicted as absolute expression values and colour coded to indicate high (red) and low (green) expression values.

Table S1: *XTH* genes for which *XTHpro::GUS* reporter lines were available were screened for shade-induced differential petiole growth.

| Gene name      | AGI ID    | GUS staining in petioles** |
|----------------|-----------|----------------------------|
| <i>AtXTH1</i>  | At4g13080 | None                       |
| <i>AtXTH5</i>  | At5g13870 | None                       |
| <i>AtXTH8</i>  | At1g11545 | None                       |
| <i>AtXTH9</i>  | At4g03210 | +                          |
| <i>AtXTH12</i> | At5g57530 | None                       |
| <i>AtXTH14</i> | At4g25820 | None                       |
| <i>AtXTH15</i> | At4g14130 | +                          |
| <i>AtXTH18</i> | At4g30280 | None                       |
| <i>AtXTH19</i> | At4g30290 | +                          |
| <i>AtXTH20</i> | At5g48070 | None                       |
| <i>AtXTH21</i> | At2g18800 | None                       |
| <i>AtXTH23</i> | At4g25810 | None                       |
| <i>AtXTH24</i> | At4g30270 | None                       |
| <i>AtXTH25</i> | At5g57550 | None                       |
| <i>AtXTH27</i> | At2g01850 | None                       |
| <i>AtXTH28</i> | At1g14720 | None                       |
| <i>AtXTH29</i> | At4g18990 | None                       |
| <i>AtXTH32</i> | At2g36870 | None                       |
| <i>AtXTH33</i> | At1g10550 | None                       |

\*\* Based on staining in petioles from plants treated for 24 h in shade relative to petioles from plants treated for 24 h in white light
